# Supplementary material for: Isotopic evidence for the formation of the Moon in a canonical giant impact
Source: PubMed Central journal article supplement (PMC7985389; doi:10.1038/s41467-021-22155-7), 2021-03-22
Supplement: 41467_2021_22155_MOESM1_ESM.pdf [file 41467_2021_22155_MOESM1_ESM.pdf]

Supplement for:

Isotopic evidence for the formation of the Moon  
in a canonical giant impact

Sune G. Nielsen<sup>1,2</sup>, David V. Bekaert<sup>1</sup> and Maureen Auro<sup>1</sup>

<sup>1</sup>NIRVANA laboratories, Woods Hole Oceanographic Institution, Woods Hole, MA 02543, USA,

<sup>2</sup>Department of Geology and Geophysics, Woods Hole Oceanographic Institution, Woods Hole, MA 02543, USA

## Supplementary Note 1: Correction for GCR production of $^{50}\text{V}$ in lunar rocks and chondrites

The V isotope compositions of many lunar rocks are strongly perturbed by galactic cosmic ray (GCR) effects (Fig. 1) that lead to production of  $^{50}\text{V}$  most likely through interaction with target nuclei of Fe<sup>1</sup>. It is also possible to produce  $^{50}\text{V}$  enrichments via GCR interactions with isotopes of Ti and Cr, but these have been shown to be very limited, first because Cr cross sections are not very favorable for  $^{50}\text{V}$  production and secondly because V isotope anomalies in lunar rocks produce poor correlations with Ti/V ratios<sup>1</sup>. Furthermore, V isotope analyses of chondrites reveal significant scatter if corrected using Ti/V ratios abundances, whereas corrections using Fe/V ratios produce entirely invariant V isotope ratios in chondrites<sup>2</sup>.

Here we combine all the available lunar V isotope data with their respective cosmic ray exposure (CRE) ages (available in the literature) and Fe/V ratios to produce an empirical calibration line that allows for correction of GCR effects (Fig. 1). The best-fit line through all the data is a York-regression<sup>3</sup> that takes into account all the errors on the CRE ages, Fe/V ratios, and V isotope compositions. The slope of the line is  $-2.132 \times 10^{-6} \pm 0.188 \times 10^{-6}$  (2SE) and the intercept with the y-axis (e.g., the calculated irradiation-free V isotope composition of the Moon) is  $\delta^{51}\text{V}_{\text{Moon}} = -1.037 \pm 0.031\text{‰}$  (2SE). The best-fit curve also includes one lunar soil sample (10084), which, despite a large error on the CRE age, plots on the curve. Although we here include the lunar soil sample in our regression, it is important to note that lunar soil samples in many cases are not expected to conform to the GCR curve (Fig. 1) because they can be contaminated by chondritic debris from relatively recent impacts. Furthermore, lunar soils are often heterogeneous, which can render different sub-samples with significantly different CRE ages. Hence, lunar soils are generally not ideal samples to construct V isotope GCR corrections from. Here, we do include the one lunar soil sample in our regression because it plots together with 25 other lunar samples. In addition, our regression weights according to sample error bars and, therefore, the lunar soil has a negligible effect on the calculated slope due to the large CRE age uncertainty.

In order to test whether this value is biased by samples with large GCR corrections, we can correct individual samples for irradiation by using the best fit correlation line in Fig. 1. In this approach we only include samples with GCR corrections  $< 0.3\text{‰}$  (Samples 12004, 12063, 14053, 14321, 15535, 68815, 68115, 74255, 74275, and LAP02205), as smaller GCR corrections are associated with smaller systematic errors. These samples yield an error-weighted average value of  $\delta^{51}\text{V}_{\text{Moon}} = -1.033 \pm 0.031\text{‰}$  ( $n = 10$ , 2SE), demonstrating that our average GCR-corrected value for all lunar rocks is not biased by samples with large irradiation corrections. Hence, the slope of the GCR correction curve does not have a large impact on the overall value of  $\delta^{51}\text{V}_{\text{Moon}}$ . Here, we choose to use the irradiation free intercept in Fig. 1 as the best estimate for the V isotope composition of the Moon ( $\delta^{51}\text{V}_{\text{Moon}} = -1.037 \pm 0.031$ ;  $n = 26$ , 2SE). In section 2 we also discuss two alternative statistical means to calculate the average composition of the Moon in order to emphasize the robustness of the value employed here.

Supplementary table 1 and Supplementary figure 1 show the GCR corrected data and the average V isotope compositions for all lunar rocks measured to date. Samples with larger uncertainties either have large errors for their CRE ages, larger V isotope measurement errors, or both (Supplementary table 1). To investigate the consistency between our V isotope data sets for lunar rocks and that from<sup>1</sup>, we calculate the average  $\delta^{51}\text{V}_{\text{Moon}}$  for samples from each of the two studies. In both cases we calculate weighted means of the two data populations whereby samples are assigned a weight of one divided by the total propagated error squared. The two error-weighted average values are remarkably similar at  $\delta^{51}\text{V} = -1.012 \pm 0.067$  ( $n = 16$ , 2SE) and  $\delta^{51}\text{V} = -1.041 \pm$

74 0.030‰ (n = 10, 2SE), which implies excellent agreement between both studies. This conclusion  
 75 is further supported by Monte Carlo simulations, whereby raw data (actual values and their  
 76 associated uncertainties) are used to artificially generate 1 million datasets for each study. At each  
 77 iteration step, the difference of mean  $\delta^{51}\text{V}$  between the two studies is computed as  $\Delta^{51}\text{V}_{\text{HPK-TS}} =$   
 78  $\delta^{51}\text{V}_{\text{HPK}} - \delta^{51}\text{V}_{\text{TS}}$ , where "HPK" and "TS" refer to Hopkins et al.<sup>(ref 1)</sup> and this study, respectively.  
 79 The outcomes of this simulation are reported in Supplementary figure 2, supporting the excellent  
 80 agreement between the two datasets, with a mean  $\Delta^{51}\text{V}_{\text{HPK-TS}}$  value very close to zero (i.e., no  
 81 statistical difference).  
 82

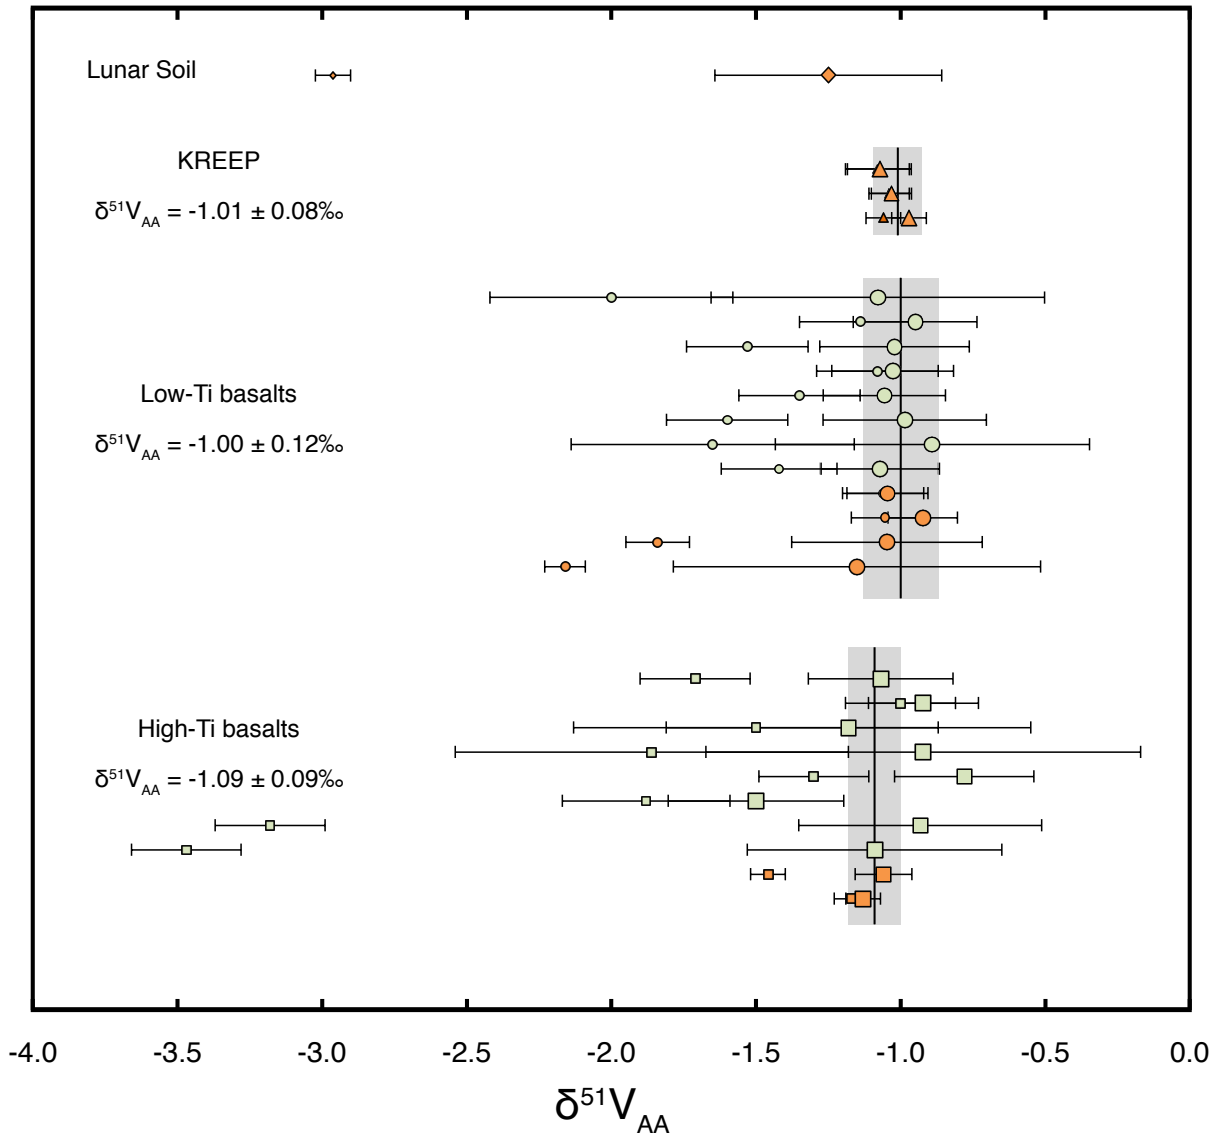

83 **Supplementary figure 1:** Plot of uncorrected (small symbols) and irradiation corrected (large  
 84 symbols) lunar vanadium isotope data. Data are grouped into Lunar soils (diamonds), KREEP  
 85 (triangles), Low-Ti basalts (circles), and High-Ti basalts (squares). Green samples are literature  
 86 data<sup>1</sup>, orange data are from this study. Grey bars denote weighted averages and 2SE uncertainties  
 87 of each sample group. Data are listed in Supplementary Table 1.  
 88  
 89

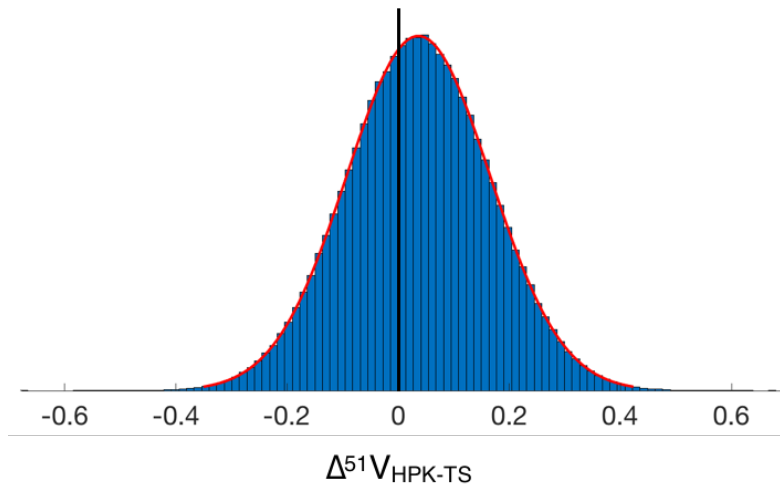

91  
92 **Supplementary figure 2:** Difference in the mean  $\delta^{51}\text{V}$  of the Moon computed from datasets of  
93 ref. 1 and this study ( $\Delta^{51}\text{V}_{\text{HPK-TS}}$ ), as derived from 1 million runs of Monte Carlo simulation.  
94

95 **Supplementary Note 2: The vanadium isotopic difference between the BSE**  
96 **and the Moon**  
97

98 The difference between the mean  $\delta^{51}\text{V}$  value of the Moon and BSE is small, being  $\sim 0.2\%$ , but  
99 resolvable at our present level of precision. To demonstrate and quantify this difference, we present a  
100 series of statistical considerations. Supplementary figure 3 shows the densities we obtained through  
101 Kernel density estimation, as well as the histograms and corresponding Gaussian fits for the Moon and  
102 BSE vanadium isotope data. It is notable that the density of Moon  $\delta^{51}\text{V}$  statistics is shifted towards the  
103 left-hand side with respect to the density of Earth statistics. This suggests that Moon and Earth  $\delta^{51}\text{V}$   
104 statistics do not have the same means and that the mean for the Moon is lower.

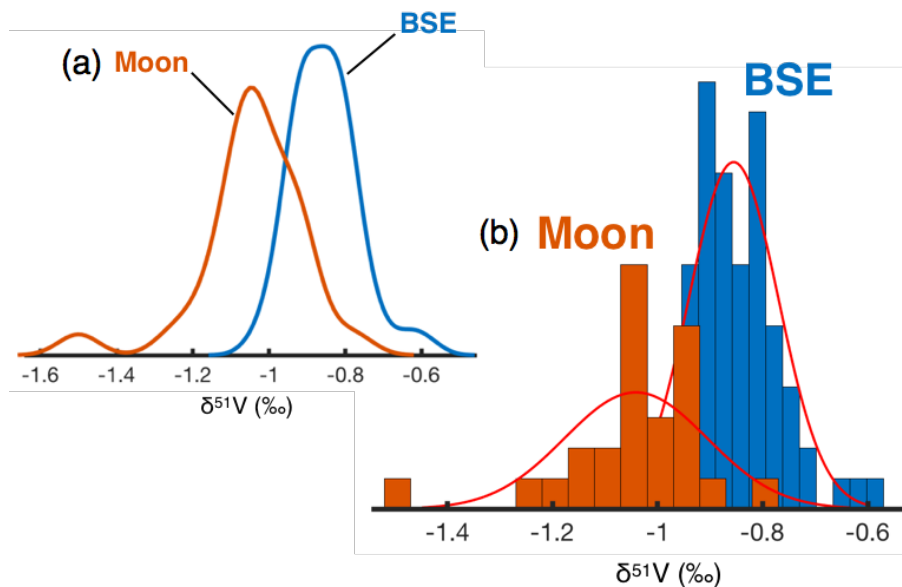

105  
106 **Supplementary figure 3:** Comparison between the V isotopic datasets for the Moon and BSE,  
107 with (a) Kernel estimate densities and (b) frequency distributions showed as histograms with their  
108 associated Gaussian best fits.

109 Here, we carried out Monte Carlo simulations using the raw data for the BSE and Moon  
 110 data sets and their associated individual uncertainties to artificially generate 1 million datasets, and  
 111 hence compute 1 million  $\delta^{51}\text{V}$  mean values for the Moon and BSE. At each iteration step, the  
 112 difference between the mean  $\delta^{51}\text{V}$  of the BSE and the Moon was computed as  $\Delta^{51}\text{V}_{\text{BSE-Moon}} =$   
 113  $\delta^{51}\text{V}_{\text{BSE}} - \delta^{51}\text{V}_{\text{Moon}}$ . The distribution of  $\Delta^{51}\text{V}_{\text{BSE-Moon}}$  values is shown in Supplementary figure 4,  
 114 demonstrating that the probability for the silicate Earth to have a higher mean  $\delta^{51}\text{V}$  than the Moon  
 115 (i.e.,  $\Delta^{51}\text{V}_{\text{BSE-Moon}} > 0$ ) is extremely high (99.67%). These simulations imply that a shift of  $0.186$   
 116  $\pm 0.068$  (1SD) exists between the V isotope compositions of the Moon and BSE (Supplementary  
 117 figure 7). The corresponding mean  $\delta^{51}\text{V}$  of the BSE, Chondrites and Moon are  $\delta^{51}\text{V}_{\text{BSE}} = -0.855 \pm$   
 118  $0.012$  (1SD),  $\delta^{51}\text{V}_{\text{ch.}} = -1.094 \pm 0.038$  (1SD), and  $\delta^{51}\text{V}_{\text{Moon}} = -1.041 \pm 0.067$  (1SD), respectively.  
 119

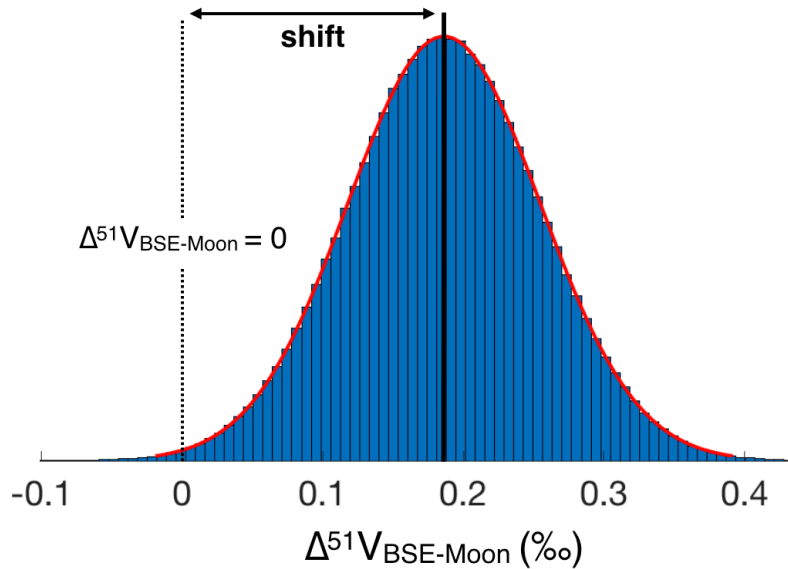

120  
 121 **Supplementary figure 4:** Frequency distribution of the V isotope difference between the BSE and  
 122 the Moon ( $\Delta^{51}\text{V}_{\text{BSE-Moon}}$ ) as generated by Monte Carlo simulations where the raw data and their  
 123 associated uncertainties are used to artificially generate 1 million mean  $\delta^{51}\text{V}_{\text{BSE}}$  and  $\delta^{51}\text{V}_{\text{Moon}}$   
 124 values.  
 125

126 When calculating the mean values and error weighted 2SE for each of BSE, chondrites,  
 127 and the Moon, it is necessary to make the assumption that all three populations are normally  
 128 distributed. One first-order observation that supports this inference is that all individual samples  
 129 in the chondrite<sup>2</sup> and Moon datasets (once corrected for GCR effects) exhibit V isotope  
 130 compositions that are all within error of each other. The same is true for 92% of the samples  
 131 representing BSE, which is expected within the 95% confidence interval for any given data  
 132 population. However, we can further perform a series of tests to investigate whether or not the  
 133 corresponding datasets are normally distributed and, hence, allow us to demonstrate the statistical  
 134 validity of the calculated averages and associated errors for each data population. In this approach,  
 135 the main limiting factor corresponds to the small amount of available data for each end-member.  
 136 However, note that the frequency distributions of  $\delta^{51}\text{V}_{\text{BSE}}$  and  $\delta^{51}\text{V}_{\text{Moon}}$  broadly follow Gaussian  
 137 distributions (Supplementary figure 3). Furthermore, quantile-quantile (Q-Q) plots of our datasets  
 138 are broadly consistent with Gaussian distributions for all three end-members (Supplementary  
 139 figure 5). These plots correspond to a graphical method for comparing two probability distributions  
 140 - here the quantiles of the sample datasets versus theoretical quantile values generated from normal

141 distributions - by plotting their quantiles against each other. However, these graphical  
142 considerations do not allow quantitatively validating/refuting the hypothesis of our datasets being  
143 normally distributed, and further statistical tests are therefore required.

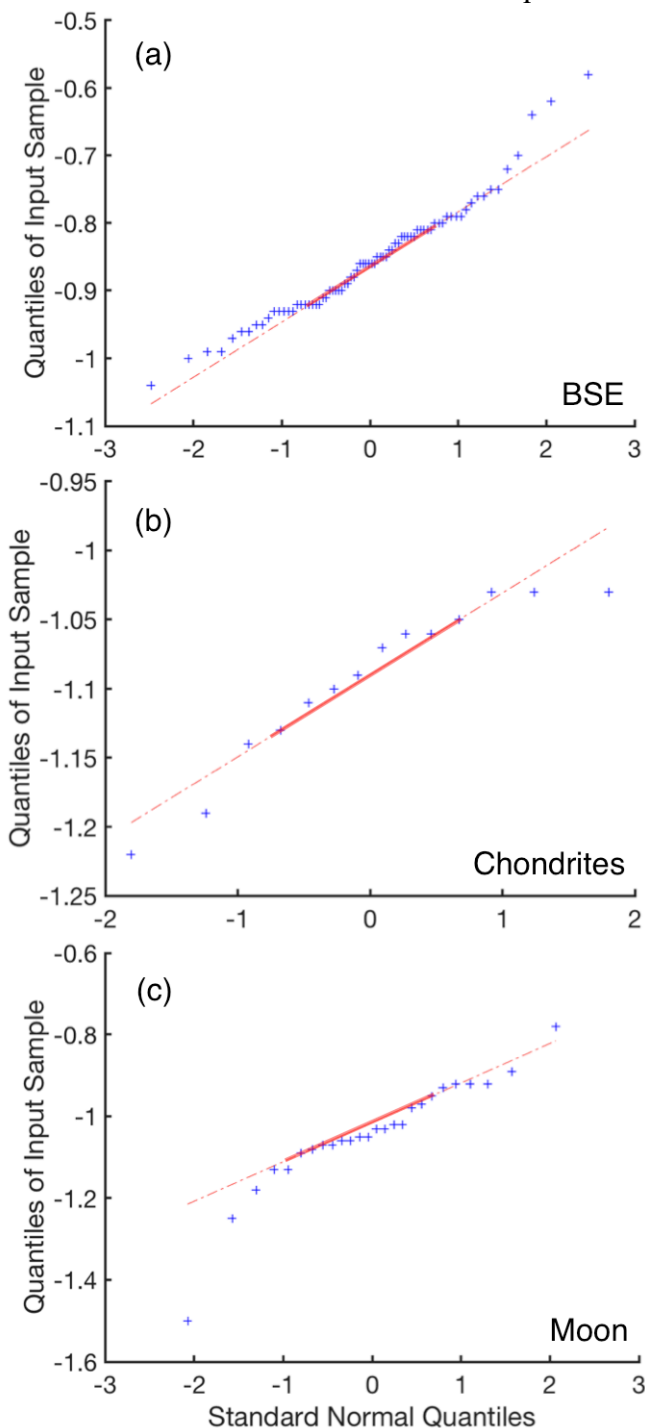

144  
145  
146 **Supplementary figure 5:** Q-Q plots comparing the probability distributions of the BSE,  
147 Chondrites and Moon V isotope raw data (Supplementary Table 1 and ref <sup>2</sup>) with normal  
148 distributions.  
149

150 First, we postulate the null hypothesis that our three sets of data come from normal  
151 distributions with mean compositions of  $\delta^{51}\text{V}_{\text{BSE}} = -0.86$ ,  $\delta^{51}\text{V}_{\text{ch.}} = -1.09$ ,  $\delta^{51}\text{V}_{\text{Moon}} = -1.04$ , and  
152 unknown variances. Student's t-tests carried out for each dataset do not reject the null hypothesis  
153 at the 5% significance level ( $\alpha = 0.05$ ). In order to compensate for the small size of our datasets  
154 and further investigate the reliability of these results, we used Monte Carlo simulations to  
155 artificially generate 1 million datasets for the BSE, chondrites and Moon from the raw data and  
156 associated uncertainties. We found that Student's t-test rates of success (i.e., no rejection of the  
157 null hypothesis at the 5% significance level) of 98.50%, 96.75% and 96.97% for the BSE,  
158 chondrites and Moon, respectively, indicating that Student's t-tests consistently fail to reject the  
159 null hypothesis.

160 We further tested the null hypothesis by carrying Lilliefors tests, which correspond to a  
161 test for goodness of fit to a normal distribution based on the Kolmogorov–Smirnov test. Unlike  
162 Student's t-tests, Lilliefors tests return p-values, which represent the probability of observing a test  
163 statistic as extreme as, or more extreme than, the observed value under the null hypothesis. In other  
164 words, small values of p cast doubt on the validity of the null hypothesis. If the p-value is less than  
165 or equal to  $\alpha$  (i.e.,  $p \leq 0.05$ ), then the Lilliefors test rejects the null hypothesis. If the p-value is  
166 greater than  $\alpha$  (i.e.,  $p > 0.05$ ), then the Lilliefors test fails to reject the null hypothesis. Here, we  
167 again used Monte Carlo simulations to artificially generate 1 million datasets for the BSE,  
168 chondrites and Moon from the raw data and associated uncertainties. We found that Lilliefors tests  
169 give mean p-values of 0.106, 0.209 and 0.131, with rates of success (i.e., no rejection of the null  
170 hypothesis) of 52.33%, 82.01% and 60.44% for the BSE, chondrites and Moon, respectively.  
171 Although these results cannot demonstrate that our datasets are normally distributed, they support  
172 the absence of significant evidence for them not to be normally distributed. In the absence of  
173 statistical arguments to reject the null hypothesis, and in light of all graphical and numerical  
174 considerations presented in this section, it appears justified to define the BSE, Moon and chondrite  
175 end-members by their "real" values (i.e., using error-weighted mean and 95% c.i.).

176 Error-weighted  $\delta^{51}\text{V}$  means are computed using IsoplotR. These give  $\delta^{51}\text{V}_{\text{BSE}} = -0.861 \pm$   
177  $0.005$  ( $n = 76$ , 2SE, MSWD=10.165),  $\delta^{51}\text{V}_{\text{ch.}} = -1.089 \pm 0.029$  ( $n = 14$ , 2SE, MSWD=0.690), and  
178  $\delta^{51}\text{V}_{\text{Moon}} = -1.036 \pm 0.028$  ( $n = 26$ , 2SE, MSWD=1.539). MSWD values close to 1 for Chondrites  
179 and the Moon indicate that error-weighted means and their associated errors are representative of  
180 the raw data dispersion. In addition, this  $\delta^{51}\text{V}_{\text{Moon}}$  value is in excellent agreement with the  
181 irradiation-free composition of the Moon as derived from the y-intercept of the best fit line to lunar  
182 V isotope data plotted against their respective CRE ages ( $\delta^{51}\text{V} = -1.037 \pm 0.031\%$ ;  $n = 26$ , 2SE,  
183 Supplementary figure 1). However, the high MSWD value for the BSE ( $\gg 1$ ) indicates that  
184  $\delta^{51}\text{V}_{\text{BSE}}$  values are overdispersed with respect to the stated analytical uncertainties, implying that  
185 the error-weighted mean and 2SE cannot be used most likely due to individual uncertainties being  
186 underestimated. This inference is also supported by the fact that some studies have reported  
187 individual sample uncertainties far lower than the long-term external reproducibility of the V  
188 isotope measurement technique<sup>4,5</sup>. We therefore compute the unweighted mean of the  $\delta^{51}\text{V}_{\text{BSE}}$ ,  
189 which gives  $\delta^{51}\text{V}_{\text{BSE}} = -0.856 \pm 0.020$  (2SE,  $n=76$ ). Computing the mean and 2SE of the  $\delta^{51}\text{V}_{\text{BSE}}$   
190 from the mean  $\delta^{51}\text{V}$  and 2SE of peridotites, MORBs, komatiites and OIBs produces a MSWD of  
191 0.77, which is suggestive of uncertainties being representative of the overall data dispersion. The  
192 mean and 2SE of the  $\delta^{51}\text{V}_{\text{BSE}}$  ( $n=76$ ) is, hence, used for mixing calculations (see section 3).

193 We ran Monte Carlo simulations (1 million runs) to investigate the range of possible  $\Delta^{51}\text{V}_{\text{BSE-}}$   
194  $\text{Moon}$  using  $\delta^{51}\text{V}_{\text{BSE}} = -0.856 \pm 0.020$  and  $\delta^{51}\text{V}_{\text{Moon}} = -1.037 \pm 0.031$ . These give mean  $\Delta^{51}\text{V}_{\text{BSE-Moon}}$   
195 of  $0.180 \pm 0.035$  (2SE; Supplementary figure 6), in good agreement with our estimate from Monte

196 Carlo simulations using raw data to artificially generate  $\delta^{51}\text{V}$  datasets for the Earth and Moon  
 197 ( $0.186 \pm 0.068$ , 1SD; Supplementary figure 4).  
 198

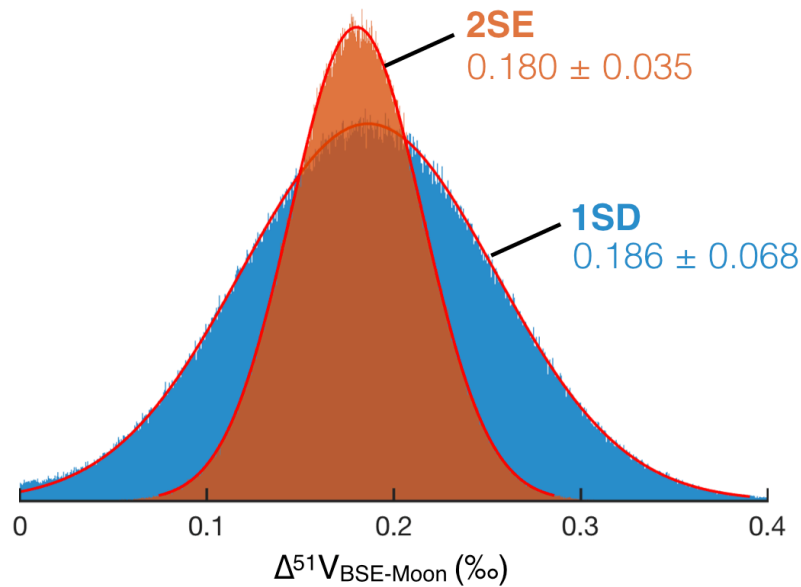

199  
 200  
 201 **Supplementary figure 6:** Frequency distribution of the V isotope difference between the BSE  
 202 and the Moon ( $\Delta^{51}\text{V}_{\text{BSE-Moon}}$ ) as generated by Monte Carlo simulations. In the first case (blue plot),  
 203 the raw data and their associated uncertainties are used to artificially generate 1 million mean  
 204  $\delta^{51}\text{V}_{\text{BSE}}$  and  $\delta^{51}\text{V}_{\text{Moon}}$  values and compute  $\Delta^{51}\text{V}_{\text{BSE-Moon}}$  (cf. Supplementary figure 4). In the second  
 205 case (orange plot), our estimated "real values" for the  $\delta^{51}\text{V}$  of the Moon and BSE and associated  
 206 2SE are used as input parameters for Monte Carlo simulations.

207  
 208  
 209 **In conclusion,** we have adopted two complementary approaches to compute the V isotope  
 210 difference between the Moon and BSE. The first one (**A1**) relies on Monte Carlo simulations using  
 211 the raw data and their associated uncertainties to artificially generate 1 million datasets and  
 212 compute mean V isotope compositions for the Moon, BSE and chondrites. This approach yields  
 213  $\Delta^{51}\text{V}_{\text{BSE-Moon}} = 0.186 \pm 0.068$  (1SD),  $\delta^{51}\text{V}_{\text{BSE}} = -0.855 \pm 0.012$  (1SD),  $\delta^{51}\text{V}_{\text{ch.}} = -1.094 \pm 0.038$   
 214 (1SD), and  $\delta^{51}\text{V}_{\text{Moon}} = -1.041 \pm 0.067$  (1SD). The second approach (**A2**) uses the means and 2SE  
 215 of the three end-members. This approach yields  $\Delta^{51}\text{V}_{\text{BSE-Moon}} = 0.180 \pm 0.035$  (2SE),  $\delta^{51}\text{V}_{\text{BSE}} = -$   
 216  $0.856 \pm 0.020$  (2SE),  $\delta^{51}\text{V}_{\text{ch.}} = -1.089 \pm 0.029$  (2SE), and  $\delta^{51}\text{V}_{\text{Moon}} = -1.036 \pm 0.028$  (2SE). The  
 217 results of these two approaches are in very good agreement with each other, and are summarized  
 218 in Supplementary figure 7.  
 219



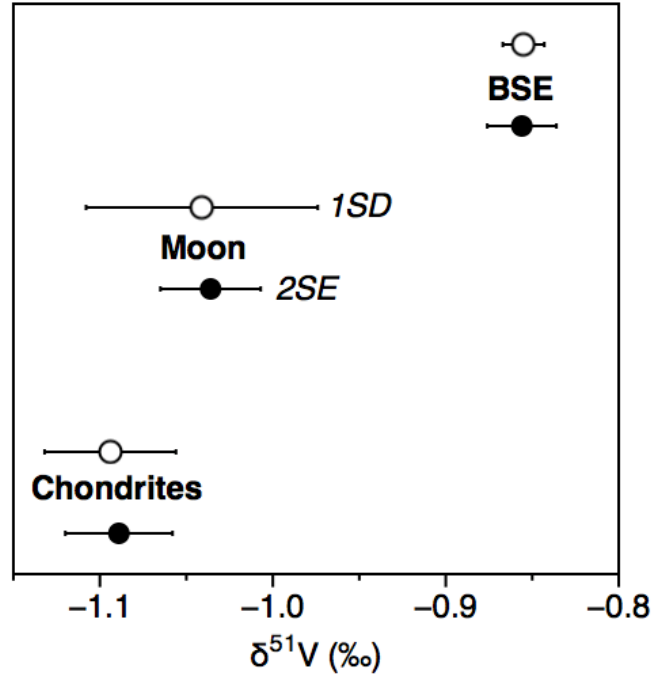

220  
221  
222  
223  
224  
225  
226

**Supplementary figure 7:** Comparison between the mean V isotopic compositions of the Moon, chondrites and BSE from (i) the raw data-driven Monte Carlo approach (open symbols, errors bars at 1SD), and (ii) computation of the "real" values of these end-members (closed symbols).

227 **Supplementary Note 3: Vanadium isotope constraints the Moon-forming**  
228 **event**

229 Mixing calculations presented in this paper rely on the fundamental principle of mass  
230 conservation during two-component mixing, for a system with pre-impact (proto-Earth, Theia) and  
231 post-impact (Earth, Moon, escaping mass (EM)) components (see ref<sup>6</sup> for description of a similar  
232 approach). We consider  $\delta^{51}\text{V}_{\text{P-E}}$ ,  $\delta^{51}\text{V}_{\text{Theia}}$ ,  $\delta^{51}\text{V}_{\text{BSE}}$ , and  $\delta^{51}\text{V}_{\text{Moon}}$  the  $\delta^{51}\text{V}$  values of the proto-Earth,  
233 Theia, BSE and Moon, respectively. The  $\delta^{51}\text{V}_{\text{BSE}} = -0.856 \pm 0.020$  (2SE),  $\delta^{51}\text{V}_{\text{ch.}} = -1.089 \pm 0.029$   
234 (2SE), and  $\delta^{51}\text{V}_{\text{Moon}} = -1.037 \pm 0.031$  (2SE) are taken from the respective best estimates for each  
235 reservoir, which yields a best estimate for the V isotope composition difference between BSE and  
236 the Moon of  $\Delta^{51}\text{V}_{\text{BSE-Moon}} = 0.180 \pm 0.035$  (2SE). The V isotope composition of Theia is assumed  
237 to be indistinguishable from chondrites ( $\delta^{51}\text{V}_{\text{Theia}} = \delta^{51}\text{V}_{\text{ch.}}$ ), which is conventionally assumed in  
238 most Giant Impact simulations and also reasonable given that all chondrite groups have identical  
239 V isotope compositions<sup>2</sup>. Given that V is only mildly siderophile and, therefore, core formation  
240 does not tend to produce a silicate portion of a planet with concentrations significantly different to  
241 bulk chondrites, we here assume that the proto-Earth, Theia and the Moon all have similar V  
242 concentrations. Most chondrites have V concentrations that are within error of BSE ( $82 \pm 12$   $\mu\text{g/g}$   
243 <sup>2</sup>). So far we only have V data for two enstatite chondrites and these suggest the potential for the  
244 chondritic impactor to have had lower V concentrations than considered here ( $\sim 50$   $\mu\text{g/g}$  <sup>2</sup>).  
245 However, a lower V concentration for the impactor would only change our model in a minor way,  
246 and would invariably lead to slightly higher mass fractions of Theia ( $\phi_{\text{M}}$ ) being required in the  
247 Moon to account for its present-day V isotope composition. Thus, a lower V concentration for

248 Theia would further strengthen our conclusion that the observed  $\Delta^{51}\text{V}_{\text{BSE-Moon}}$  is only compatible  
 249 with the canonical giant impact simulations. The mass fractions of the present-day Moon and Earth  
 250 that originate from Theia are denoted  $\varphi_M$  and  $\varphi_E$ , respectively, with:

$$251 \quad \delta^{51}\text{V}_{\text{BSE}} = \varphi_E * \delta^{51}\text{V}_{\text{Theia}} + (1 - \varphi_E) * \delta^{51}\text{V}_{\text{P-E}} \quad (\text{Eq. 1})$$

$$252 \quad \delta^{51}\text{V}_{\text{Moon}} = \varphi_M * \delta^{51}\text{V}_{\text{Theia}} + (1 - \varphi_M) * \delta^{51}\text{V}_{\text{P-E}} \quad (\text{Eq. 2})$$

253  
 254  
 255  
 256 These two equations contain 3 unknowns, which are  $\varphi_E$ ,  $\varphi_M$  and  $\delta^{51}\text{V}_{\text{P-E}}$ . Mass conservation  
 257 implies:

$$258 \quad M_{\text{Theia}} = \varphi_E * M_{\text{Earth}} + \varphi_M * M_{\text{Moon}} + EM \quad (\text{Eq. 3})$$

259  
 260 where  $M_{\text{Theia}}$ ,  $M_{\text{Earth}}$  and  $M_{\text{Moon}}$  are the total masses of Theia, Earth and Moon, respectively.  
 261 Whereas the two latter are known,  $M_{\text{Theia}}$  is taken as a free parameter that will be varied from  $0.8$   
 262  $* M_{\text{Mars}}$  to  $0.5 * M_{\text{Earth}}$ , where  $M_{\text{Mars}}$  corresponds to the total mass of Mars. In this approach, the  
 263  $EM$  (ejected mass) term can be neglected, as only the fraction of Theia's material ultimately  
 264 entering either the Moon or Earth is considered in the mass balance. In other words, two scenarios  
 265 where  $M_{\text{Theia}} = 1.2 * M_{\text{Mars}}$  and  $EM = 0.2 * M_{\text{Mars}}$ , or  $M_{\text{Theia}} = 1.0 * M_{\text{Mars}}$  and  $EM = 0 * M_{\text{Mars}}$  will  
 266 give the exact same outcomes. The system of Eq. 1-3 hence contains 3 unknowns, and can  
 267 therefore be fully resolved to investigate the ranges of admissible  $\varphi_E$ ,  $\varphi_M$  and  $\delta^{51}\text{V}_{\text{P-E}}$  values as  
 268 constrained by V isotope systematics. We also note  $\varphi_{M-T}$  the fraction of Theia that ends up being  
 269 incorporated in the Moon:

$$270 \quad \varphi_{T-M} = \varphi_M * M_{\text{Moon}} / M_{\text{Theia}} \quad (\text{Eq. 4})$$

271  
 272  
 273 A summary of the main outcomes of these mixing calculations is reported in Table 1,  
 274 whereas Fig. 3 of the main manuscript presents illustrations of the mixing calculations where  $M_{\text{Theia}}$   
 275 represents  $0.8 * M_{\text{Mars}}$ ,  $1.2 * M_{\text{Mars}}$ , and  $M_{\text{Theia}} = 0.45 * M_{\text{Earth}}$ . As illustrated in Supplementary figure  
 276 8, using  $\delta^{51}\text{V}_{\text{BSE}}$ ,  $\delta^{51}\text{V}_{\text{Theia}}$ ,  $\delta^{51}\text{V}_{\text{Moon}}$  and  $\Delta^{51}\text{V}_{\text{BSE-Moon}}$  values as derived from our first approach A1  
 277 would essentially give the same outcomes (at the 1SD level) as what is presented in the manuscript.  
 278 This supports our conclusion that V isotope systematics for lunar samples requires the Moon to be  
 279 predominantly derived from the impactor, as predicted by the canonical giant impact scenario.  
 280

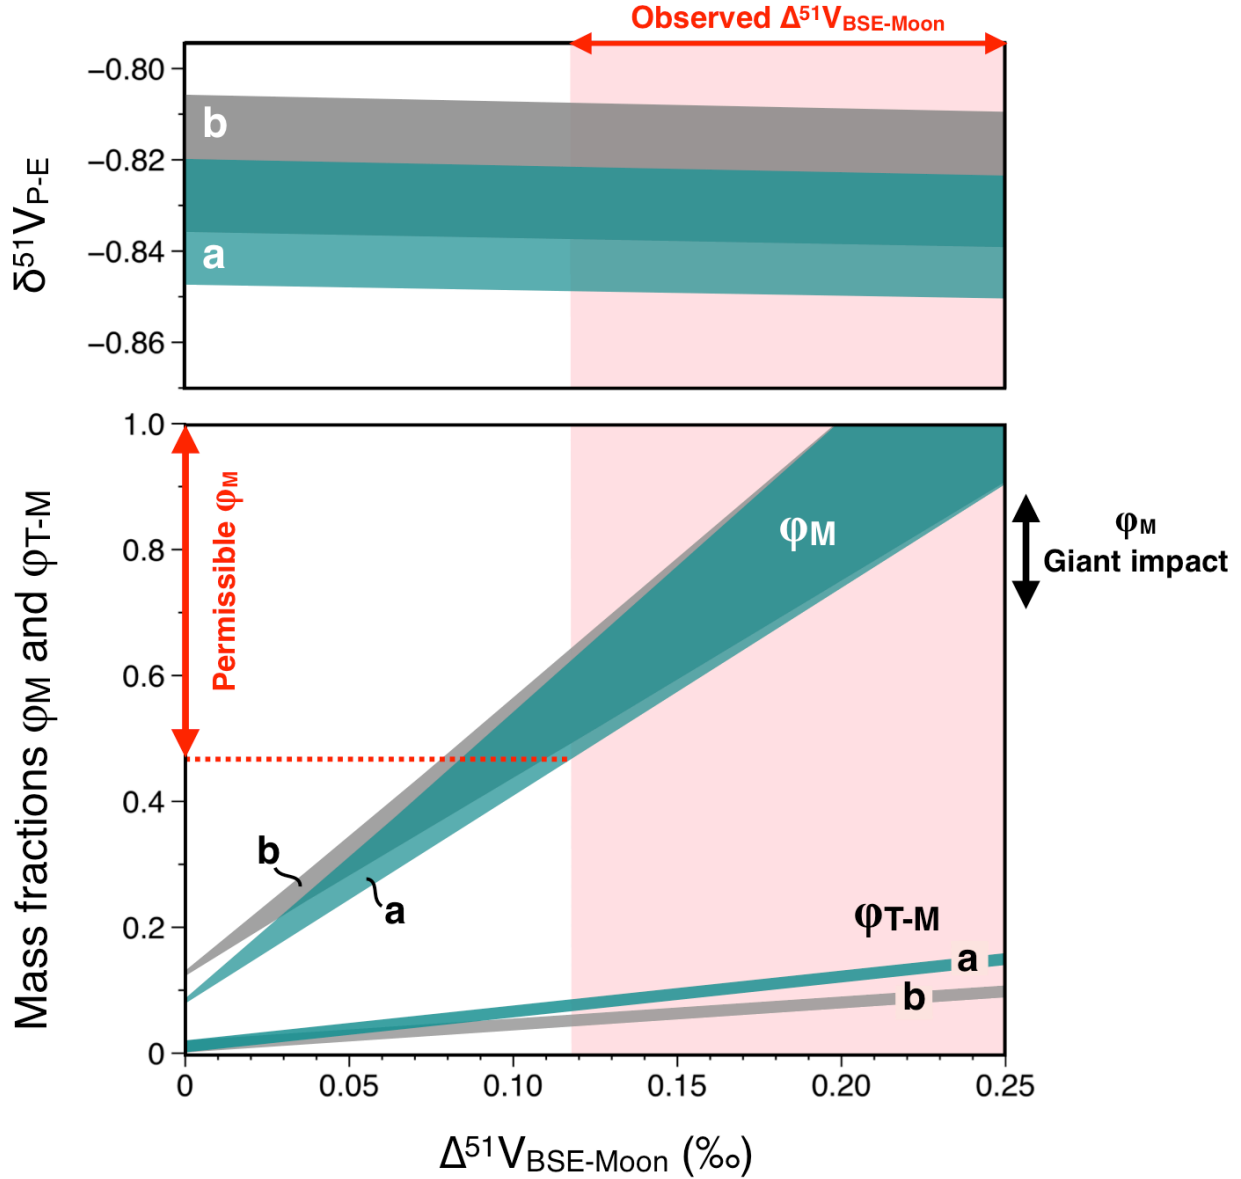

281  
 282  
 283  
 284  
 285  
 286  
 287  
 288  
 289  
 290  
 291  
 292

**Supplementary figure 8:** Results of mass balance calculations for giant impacts where Theia's mass ( $M_{\text{Theia}}$ ) represents 0.8 (a) or 1.2 (b) times that of Mars ( $M_{\text{Mars}}$ ), using end-member values from approach A1 (instead of approach A2, as presented in Figure 3 of the main manuscript). Given the observed  $\Delta^{51}\text{V}_{\text{BSE-Moon}} = 0.186 \pm 0.068$  (1SD), it can be seen that the minimum fraction of Theia in the Moon is  $\sim 50\%$ , in very good agreement with constraints from Figure 3 of the main manuscript based on end-member compositions from approach A2.  $\phi_{\text{M}}$ : mass fraction of the present-day Moon that originates from Theia.  $\phi_{\text{T-M}}$ : mass fraction of Theia that has been incorporated in the Moon ( $= \phi_{\text{M}} * M_{\text{Moon}} / M_{\text{Theia}}$ ).  $\delta^{51}\text{V}_{\text{P-E}}$ : V isotopic composition of the proto-Earth.

293  
294

**Supplementary Table 1:** Vanadium isotope compositions and GCR corrections for lunar samples.

| Sample                    | Type           | V<br>( $\mu\text{g/g}$ ) | Fe<br>( $\mu\text{g/g}$ ) | CRE age<br>(Myr) <sup>§</sup> | error<br>(2sd) | $\delta^{51}\text{V}_{\text{meas}}$ | error<br>(2sd) | n | $\delta^{51}\text{V}_{\text{corr}}$ | error*<br>(2sd) |
|---------------------------|----------------|--------------------------|---------------------------|-------------------------------|----------------|-------------------------------------|----------------|---|-------------------------------------|-----------------|
| <u>Hopkins et al 2019</u> |                |                          |                           |                               |                |                                     |                |   |                                     |                 |
| 10017                     | High-Ti basalt | 68                       | 157635                    | 479                           | 60             | -3.47                               | 0.19           | 1 | -1.09                               | 0.35            |
| 10017                     | High-Ti basalt | 70                       | 154955                    | 479                           | 60             | -3.18                               | 0.19           | 1 | -0.93                               | 0.34            |
| 10020                     | High-Ti basalt | 104                      | 146310                    | 127                           | 25             | -1.88                               | 0.29           | 2 | -1.50                               | 0.30            |
| 10044                     | High-Ti basalt | 42                       | 147476                    | 70                            | 17             | -1.30                               | 0.19           | 3 | -0.78                               | 0.23            |
| 70255                     | High-Ti basalt | 92                       | 144242                    | 280                           | 85             | -1.86                               | 0.68           | 3 | -0.92                               | 0.74            |
| 71135                     | High-Ti basalt | 101                      | 144756                    | 103                           | 3              | -1.50                               | 0.63           | 3 | -1.18                               | 0.63            |
| 74275                     | High-Ti basalt | 118                      | 141629                    | 32                            | 1              | -1.00                               | 0.19           | 3 | -0.92                               | 0.19            |
| 75035                     | High-Ti basalt | 37                       | 143636                    | 77.4                          | 19.3           | -1.71                               | 0.19           | 2 | -1.07                               | 0.25            |
| 12018                     | Low-Ti basalt  | 182                      | 160419                    | 195                           | 16             | -1.42                               | 0.20           | 3 | -1.05                               | 0.20            |
| 12054                     | Low-Ti basalt  | 118                      | 161584                    | 260                           | 70             | -1.65                               | 0.49           | 3 | -0.89                               | 0.53            |
| 12054                     | Low-Ti basalt  | 143                      | 158737                    | 260                           | 70             | -1.60                               | 0.21           | 4 | -0.98                               | 0.27            |
| 12063                     | Low-Ti basalt  | 115                      | 166756                    | 95                            | 5              | -1.35                               | 0.21           | 3 | -1.06                               | 0.21            |
| 14053                     | Low-Ti basalt  | 108                      | 133525                    | 21.2                          | 5              | -1.08                               | 0.21           | 3 | -1.02                               | 0.21            |
| 15016                     | Low-Ti basalt  | 234                      | 173167                    | 322                           | 83             | -1.53                               | 0.21           | 2 | -1.02                               | 0.25            |
| 15535                     | Low-Ti basalt  | 217                      | 178968                    | 110                           | 20             | -1.14                               | 0.21           | 2 | -0.95                               | 0.21            |
| 15556                     | Low-Ti basalt  | 211                      | 166707                    | 546                           | 214            | -2.00                               | 0.42           | 2 | -1.08                               | 0.55            |
|                           |                |                          |                           |                               |                |                                     |                |   | weighted average <sup>#</sup>       | -1.012          |
|                           |                |                          |                           |                               |                |                                     |                |   | weighted 2SE                        | 0.067           |
| <u>This study</u>         |                |                          |                           |                               |                |                                     |                |   |                                     |                 |
| 10084                     | Soil           | 53                       | 81177                     | 520                           | 120            | -2.96                               | 0.06           | 8 | -1.25                               | 0.40            |
| 12004                     | Low-Ti basalt  | 117                      | 148628                    | 49                            | 10             | -1.05                               | 0.12           | 7 | -0.92                               | 0.12            |
| 15495                     | Low-Ti basalt  | 101                      | 151612                    | 320                           | 200            | -2.16                               | 0.07           | 3 | -1.13                               | 0.65            |
| 15556                     | Low-Ti basalt  | 224                      | 155451                    | 546                           | 214            | -1.84                               | 0.11           | 4 | -1.03                               | 0.33            |
| LAP02205                  | Low-Ti basalt  | 99                       | 171363                    | 4                             | 1              | -1.06                               | 0.14           | 3 | -1.05                               | 0.14            |
| 70215                     | High-Ti basalt | 94                       | 139463                    | 126                           | 3              | -1.46                               | 0.06           | 4 | -1.06                               | 0.10            |
| 74255                     | High-Ti basalt | 102                      | 102272                    | 17                            | 2              | -1.17                               | 0.06           | 4 | -1.13                               | 0.06            |
| 68815                     | KREEP-rich     | 21                       | 40272                     | 2.04                          | 0.2            | -1.04                               | 0.07           | 4 | -1.03                               | 0.07            |
| 68115                     | KREEP-rich     | 21                       | 32458                     | 2.08                          | 0.08           | -1.08                               | 0.11           | 4 | -1.07                               | 0.11            |
| 14321                     | KREEP-rich     | 56                       | 100850                    | 23.8                          | 2              | -1.06                               | 0.06           | 4 | -0.97                               | 0.06            |
|                           |                |                          |                           |                               |                |                                     |                |   | weighted average <sup>#</sup>       | -1.041          |
|                           |                |                          |                           |                               |                |                                     |                |   | weighted 2SE                        | 0.030           |

295  
296  
297  
298  
299  
300  
301  
302  
303

\* - total propagated error combines uncertainties on V isotope measurement, CRE age, Fe and V concentrations.

<sup>#</sup> - Averages and associated 2 sigma errors weighted by total propagated error on each measurement

<sup>§</sup> - CRE ages are based on noble gas isotope measurements in each sample<sup>1,7-15</sup>, except for 15495 that is based on range of CRE ages for samples at the edge of the Dune Crater where this sample was collected<sup>8</sup>

304 **References**

- 305 1 Hopkins, S. S. *et al.* The vanadium isotopic composition of lunar basalts. *Earth Planet.*  
306 *Sci. Lett.* **511**, 12-24 (2019).
- 307 2 Nielsen, S. G., Bekaert, D. V., Magna, T., Mezger, K. & Auro, M. The Vanadium Isotope  
308 Composition of Mars: Implications for Planetary Differentiation in the Early Solar  
309 System *Geochemical Perspectives Letters* **15**, 35-39 (2020).
- 310 3 York, D., Evensen, N. M., Martinez, M. L. & Delgado, J. D. Unified equations for the  
311 slope, intercept, and standard errors of the best straight line. *Am J Phys* **72**, 367-375,  
312 doi:10.1119/1.1632486 (2004).
- 313 4 Qi, Y. H. *et al.* The vanadium isotopic composition of the BSE: constraints from  
314 peridotites and komatiites. *Geochim. Cosmochim. Acta.* **259**, 288-301,  
315 doi:10.1016/j.gca.2019.06.008 (2019).
- 316 5 Wu, F. *et al.* Vanadium isotope compositions of mid-ocean ridge lavas and altered  
317 oceanic crust. *Earth Planet. Sci. Lett.* **493**, 128-139,  
318 doi:<https://doi.org/10.1016/j.epsl.2018.04.009> (2018).
- 319 6 Akram, W. & Schönbächler, M. Zirconium isotope constraints on the composition of  
320 Theia and current Moon-forming theories. *Earth Planet. Sci. Lett.* **449**, 302-310,  
321 doi:<https://doi.org/10.1016/j.epsl.2016.05.022> (2016).
- 322 7 Shuster, D. L. & Cassata, W. S. Paleotemperatures at the lunar surfaces from open system  
323 behavior of cosmogenic <sup>38</sup>Ar and radiogenic <sup>40</sup>Ar. *Geochim. Cosmochim. Acta.* **155**,  
324 154-171, doi:<https://doi.org/10.1016/j.gca.2015.01.037> (2015).
- 325 8 Husain, L. <sup>40</sup>Ar-<sup>39</sup>Ar chronology and cosmic ray exposure ages of the Apollo 15  
326 samples. *Journal of Geophysical Research (1896-1977)* **79**, 2588-2606,  
327 doi:doi:10.1029/JB079i017p02588 (1974).
- 328 9 Jordan, J. L., Heymann, D. & Lakatos, S. Inert gas patterns in the regolith at the Apollo  
329 15 landing site. *Geochim. Cosmochim. Acta.* **38**, 65-78, doi:[https://doi.org/10.1016/0016-](https://doi.org/10.1016/0016-7037(74)90195-1)  
330 [7037\(74\)90195-1](https://doi.org/10.1016/0016-7037(74)90195-1) (1974).
- 331 10 Eberhardt, P. *et al.* Trapped solar wind noble gases, exposure age and K/Ar-age in Apollo  
332 11 lunar fine material, in *Proceedings of the Apollo 11 Lunar Science Conference.* 1037-  
333 1070.
- 334 11 Drozd, R. J., Hohenberg, C. M., Morgan, C. J. & Ralston, C. E. Cosmic-ray exposure  
335 history at the Apollo 16 and other lunar sites: lunar surface dynamics. *Geochim.*  
336 *Cosmochim. Acta.* **38**, 1625-1642, doi:[https://doi.org/10.1016/0016-7037\(74\)90178-1](https://doi.org/10.1016/0016-7037(74)90178-1)  
337 (1974).
- 338 12 Lugmair, G. W. & Marti, K. Exposure Ages and Neutron Capture Record in Lunar  
339 Samples from Fra Mauro, in *Proceedings of the third Lunar Science Conference.* 1891-  
340 1897.
- 341 13 Eugster, O. *et al.* The cosmic-ray exposure history of Shorty Crater samples; The age of  
342 Shorty Crater, in *Proceedings of the eighth Lunar Science Conference.* 3059-3082.
- 343 14 Drozd, R. J., Hohenberg, C. M., Morgan, C. J., Podosek, F. A. & Wroge, M. L. Cosmic  
344 Ray Exposure History at Taurus-Littrow, in *Proceedings of the 8th Lunar Science*  
345 *Conference.* 3027-3043.
- 346 15 Hintenberger, H., Weber, H. W. & Takaoka, N. Concentrations and isotopic abundances  
347 of the rare gases in lunar matter, in *Proceedings of the second Lunar Science Conference.*  
348 1607-1625.
- 349
